# Supplementary material for: Cocaine-induced endocannabinoid signaling mediated by sigma-1 receptors and extracellular vesicle secretion
Source: eLife. 2019 Oct 9;8:e47209. doi: 10.7554/eLife.47209 (PMC6850780; doi:10.7554/eLife.47209)
Supplement: Source data 1. [file elife-47209-data1.xlsx]

## Sheet: Nakamura et al.
Source Data	n = MICE	n = CELLS/REPLICATES	STATISTICAL TEST	ANOVA VALUE	Statistical Test p VALUE	POST-HOC TEST	post-hoc p VALUE	MEAN	LOWER 95%	UPPER 95%	WHERE REPORTED
Fig.1A	3	12	1-way ANOVA	F(2,9)=5.67	0.0255						text: 120,330-333
Fig.1A vs 30 min	3	12	1-way ANOVA			Dunnett's multiple comparison	0.0156	100	164.5	-114.8 to -14.09	text: 120,330-333
Fig.1A vs 60 min	3	12	1-way ANOVA			Dunnett's multiple comparison	0.3462 ns	100	125.8	-76.14 to 24.59	text: 120,330-333
Fig.1B- no statistics											text:120,123,330-333
Fig.1C	4	19	1-way ANOVA	F(3,15)=6.216	0.0059						text: 124, 330-333
Fig.1C-veh-coc vs. veh-veh	4	19	1-way ANOVA			Dunnett's multiple comparison	<0.001	155.7	100	16.01 to 95.32	text: 124, 330-333
Fig.1C-veh-coc vs. BD-coc	4	19	1-way ANOVA			Dunnett's multiple comparison	<0.001	155.7	96.05	15.28 to 104	text: 124, 330-333
Fig.1C-veh-coc vs. BD-veh	4	19	1-way ANOVA			Dunnett's multiple comparison	<0.001	155.7	104.7	2.43 to 99.57	text: 124, 330-333
Fig.1D	4	16	1-way ANOVA	F(3,12)=10.4	0.0012						text: 124, 330-333
Fig.1D-veh-coc vs. veh-veh	4	16	1-way ANOVA			Dunnett's multiple comparison	<0.05	156.7	100	16.89 to 96.41	text: 124, 330-333
Fig.1D-veh-coc vs. NE-coc	4	16	1-way ANOVA			Dunnett's multiple comparison	<0.05	156.7	92.5	24.39 to 103.9	text: 124, 330-333
Fig.1D-veh-coc vs. NE-veh	4	16	1-way ANOVA			Dunnett's multiple comparison	<0.05	156.7	80.48	36.41 to 115.9	text: 124, 330-333
Fig.1E	4	18	1-way ANOVA	F(3,14)=6.544	0.0054						text:137,230,335-336
Fig.1E-Veh-Coc vs. Veh-Veh	4	18	1-way ANOVA			Dunnett's multiple comparison	<0.05	149	100	7.551 to 90.41	text:137,230,335-336
Fig.1E-Veh-Coc vs. SecH3-Coc	4	18	1-way ANOVA			Dunnett's multiple comparison	<0.05	149	91.48	13.56 to 101.4	text:137,230,335-336
Fig.1E-Veh-Coc vs. SecH3-Coc	4	18	1-way ANOVA			Dunnett's multiple comparison	<0.05	149	83.7	21.34 to 109.2	text:137,230,335-336
Fig.1F-no statistics											text: 143, 333-334
Fig.1G-no statictics											text: 143, 333-334
Fig.2A-no statistics											text: 170-171
Fig.2B-no statistics											text: 177
Fig.2C- no statistics EV dimensions	3	3	Mean size: 153.93 ± 1.41 nm	Mode size: 110.00 ± 1.58 nm							text: 175
Fig.2D-no statistics											text: 180-182
Fig.2E-Coc time (TH)	3	15	1-way ANOVA	F(2,12)=7.301	0.0084
Fig.2E - vs. 30	3	15	1-way ANOVA			Dunnett's multiple comparison	<0.05	100	171.4	-124.3 to -18.57	text:187,188,330-333
Fig.2E - vs. 60	3	15	1-way ANOVA			Dunnett's multiple comparison	<0.05 ns	100	103.2	-56.02 to 49.67	text:187,188,330-333
Fig.2E-Coc time (Integrin B1)	3	12	1-way ANOVA	F(2,9)=15.18	0.0013						text:187,188,330-333
Fig.2E - vs. 30	3	12	1-way ANOVA			Dunnett's multiple comparison	<0.05	100	192.9	-147.9 to -37.81	text:187,188,330-333
Fig.2E - vs. 60	3	12	1-way ANOVA			Dunnett's multiple comparison	<0.05 ns	100	86.18	-41.23 to 68.88	text:187,188,330-333
Fig.2E-Coc time (ARF6)	3	12	1-way ANOVA	F(2,9)=2.481	0.1386						text:187,188,330-333
Fig.2E - vs. 30	3	12	1-way ANOVA			Dunnett's multiple comparison	<0.05 ns	100	130.2	-95.38 to 34.97	text:187,188,330-333
Fig.2E - vs. 60	3	12	1-way ANOVA			Dunnett's multiple comparison	<0.05 ns	100	74.75	-39.92 to 90.43	text:187,188,330-333
Fig.2F-BD Coc (TH)	4	16	1-way ANOVA	F(3,12)=14.19	0.0003
Fig.2F- Veh-Coc vs. Veh-Veh	4	16	1-way ANOVA			Dunnett's multiple comparison	<0.05	147.7	100	17.65 to 77.68	text: 190, 330-333
Fig.2F- Veh-Coc vs. BD-Coc	4	16	1-way ANOVA			Dunnett's multiple comparison	<0.05	147.7	91.09	26.57 to 86.6	text: 190, 330-333
Fig.2F- Veh-Coc vs. BD-Veh	4	16	1-way ANOVA			Dunnett's multiple comparison	<0.05	147.7	79.99	37.66 to 97.69	text: 190, 330-333
Fig.2F-BD Coc (IntegrinB1)	4	16	1-way ANOVA	F(3,12)=16.29	0.0002						text: 190, 330-333
Fig.2F-Veh-Coc vs. Veh-Veh	4	16	1-way ANOVA			Dunnett's multiple comparison	<0.05	151	100	13.05 to 88.97	text: 190, 330-333
Fig.2F- Veh-Coc vs. BD-Coc	4	16	1-way ANOVA			Dunnett's multiple comparison	<0.05	151	70.68	42.37 to 118.3	text: 190, 330-333
Fig.2F- Veh-Coc vs. BD-Veh	4	16	1-way ANOVA			Dunnett's multiple comparison	<0.05	151	61.23	51.82 to 127.7	text: 190, 330-333
Fig.2F-BD Coc (ARF6)	4	16	1-way ANOVA	F(3,12)=0.7558	0.54						text: 190, 330-333
Fig.2F- Veh-Coc vs. Veh-Veh	4	16	1-way ANOVA			Dunnett's multiple comparison	<0.05 ns	130.5	100	-41.78 to 102.7	text: 190, 330-333
Fig.2F- Veh-Coc vs. BD-Coc	4	16	1-way ANOVA			Dunnett's multiple comparison	<0.05 ns	130.5	94.12	-35.91 to 108.6	text: 190, 330-333
Fig.2F- Veh-Coc vs. BD-Veh	4	16	1-way ANOVA			Dunnett's multiple comparison	<0.05 ns	130.5	99.2	-40.98 to 103.5	text: 190, 330-333
Fig.2G-Sig1R KO (TH)
Fig.2G-Sal	2	5	Unpaired t-test					100±0			text:191-192
Fig.2G-Coc	2	5	Unpaired t-test		0.395			81.62±20.45		-28.77 to 65.53	text:191-192
Fig.3A-localization: no statistics											text: 196-197,335-336
Fig.3B-qualitative: no statistics											text: 207-208, 340-342
Fig.3C-localization: no statistics											text: 202,335-336
Fig.3D-qualitative: no statistics											text: 204, 333-334
Fig.4A-IP-ARF6 (Sig1R time course)	4	19	1-way ANOVA	F(3,15)=5.193	0.0117						text: 218,336-337
Fig.4A- 0 vs 10	4	19	1-way ANOVA			Dunnett's multiple comparison	0.0058	100	52.98	13.8 to 80.24	text: 218,336-337
Fig.4A- 0 vs 20	4	19	1-way ANOVA			Dunnett's multiple comparison	0.0351	100	64.44	2.338 to 68.78	text: 218,336-337
Fig.4A- 0 vs 30	4	19	1-way ANOVA			Dunnett's multiple comparison	0.4339 ns	100	82.18	-17.41 to 53.06	text: 218,336-337
Fig.4B-IP-ARF6 (coc inhibitors)	4	27	1-way ANOVA	F(3,23)=5.326	0.0062						text: 219, 336-337
Fig.4B-Column B vs. Column A	4	27	1-way ANOVA			Dunnett's multiple comparison	0.0046	61.3	100	-66.01 to -11.39	text: 219, 336-337
Fig.4B-Column B vs. Column C	4	27	1-way ANOVA			Dunnett's multiple comparison	0.0449	61.3	89.16	-55.16 to -0.5498	text: 219, 336-337
Fig.4B-Column B vs. Column D	4	27	1-way ANOVA			Dunnett's multiple comparison	0.0092	61.3	98.25	-65.37 to -8.528	text: 219, 336-337
Fig.4C-ARF6/GAPDH (Sal & Coc in MAM)		3									text: 224-225, 340-342
Fig.4C-coc	2	3	Unpaired t-test		0.0341			100 ± 0		-61.02 to -3.981	text: 224-225, 340-342
Fig.4C-sal	2	3	Unpaired t-test					67.5 ± 10.27			text: 224-225, 340-342
Fig.4C-ARF6/GAPDH (Sal & Coc in P3)		3									text: 224-225, 340-342
Fig.4C-coc	2	3	Unpaired t-test		0.9636			100 ± 0		-39.86 to 41.28	text: 224-225, 340-342
Fig.4C-sal	2	3	Unpaired t-test					100.7 ± 14.61			text: 224-225, 340-342
Fig.4C-Sig1R/GAPDH (Sal & Coc in MAM)		3									text: 224-225, 340-342
Fig.4C-coc	2	3	Unpaired t-test		0.2049			100 ± 0		-24.08 to 7.095	text: 224-225, 340-342
Fig.4C-sal	2	3	Unpaired t-test					91.51 ± 5.615			text: 224-225, 340-342
Fig.4C-Sig1R/GAPDH (Sal & Coc in P3)		3									text: 224-225, 340-342
Fig.4C-coc	2	3	Unpaired t-test		0.152			100 ± 0		-28.13 to 6.25	text: 224-225, 340-342
Fig.4C-sal	2	3	Unpaired t-test					89.06 ± 6.191			text: 224-225, 340-342
Fig.4D-no statistics											text: 227-228, 340-342
Fig.4E- SH3 or ML7-Coc (TH)	6	30	1-way ANOVA	F(5,24)=5.998	0.001
Fig.4E-Veh-Coc vs. Veh-Veh	6	30	1-way ANOVA			Dunnett's multiple comparison	0.0074	149.9	100	11.78 to 88.07	text: 232,237,335-336,344-345
Fig.4E-Veh-Coc vs. SH3-Coc	6	30	1-way ANOVA			Dunnett's multiple comparison	0.0447	149.9	104.3	0.8548 to 90.32	text: 232,237,335-336,344-345
Fig.4E-Veh-Coc vs. SH3-sal	6	30	1-way ANOVA			Dunnett's multiple comparison	0.0007	149.9	74.96	30.23 to 119.7	text: 232,237,335-336,344-345
Fig.4E-Veh-Coc vs. ML7-Coc	6	30	1-way ANOVA			Dunnett's multiple comparison	0.002	149.9	82.39	22.8 to 112.3	text: 232,237,335-336,344-345
Fig.4E-Veh-Coc vs. ML7-sal	6	30	1-way ANOVA			Dunnett's multiple comparison	0.005	149.9	88.67	16.53 to 106	text: 232,237,335-336,344-345
Fig.4E-SH3 or ML7-Coc (Inte B1)	6	30	1-way ANOVA	F(5.24)=5.348	0.0019						text: 232,237,335-336,344-345
Fig.4E-Veh-Coc vs. Veh-Veh	6	30	1-way ANOVA			Dunnett's multiple comparison	0.0172	152.6	100	7.895 to 97.32	text: 232,237,335-336,344-345
Fig.4E-Veh-Coc vs. SH3-Coc	6	30	1-way ANOVA			Dunnett's multiple comparison	0.0067	152.6	83.83	16.9 to 120.7	text: 232,237,335-336,344-345
Fig.4E-Veh-Coc vs. SH3-sal	6	30	1-way ANOVA			Dunnett's multiple comparison	0.0021	152.6	74.58	26.15 to 129.9	text: 232,237,335-336,344-345
Fig.4E-Veh-Coc vs. ML7-Coc	6	30	1-way ANOVA			Dunnett's multiple comparison	0.0017	152.6	73.02	27.71 to 131.5	text: 232,237,335-336,344-345
Fig.4E-Veh-Coc vs. ML7-sal	6	30	1-way ANOVA			Dunnett's multiple comparison	0.0073	152.6	88.74	15.21 to 112.5	text: 232,237,335-336,344-345
Fig.4F- no statistics											text: 242
Fig.5A- 2-AG amount (brain vs EV)	4	12	1-way ANOVA	F(3,8)=86.92	<0.0001						text: 254-256, 302, 349
Fig.5A- Tissue (MB) vs. tEVs (MB)	4	12	1-way ANOVA			Tukey's multiple comparisons test	0.05	1022	206.9	616.7 to 1013	text: 254-256, 302, 349
Fig.5A- Tissue (MB) vs. Tissue (C)	4	12	1-way ANOVA			Tukey's multiple comparisons test	0.05	1022	539.1	284.5 to 681.3	text: 254-256, 302, 349
Fig.5A- Tissue (MB) vs. tEVs (C)	4	12	1-way ANOVA			Tukey's multiple comparisons test	0.05	1022	121.4	702.2 to 1099	text: 254-256, 302, 349
Fig.5A- tEVs (MB) vs. Tissue (C)	4	12	1-way ANOVA			Tukey's multiple comparisons test	0.05	206.9	539.1	-530.6 to -133.8	text: 254-256, 302, 349
Fig.5A- tEVs (MB) vs. tEVs (C)	4	12	1-way ANOVA			Tukey's multiple comparisons test	0.05 ns	206.9	121.4	-112.9 to 283.9	text: 254-256, 302, 349
Fig.5A- Tissue (C) vs. tEVs (C)	4	12	1-way ANOVA			Tukey's multiple comparisons test	0.05	539.1	121.4	219.3 to 616.1	text: 254-256, 302, 349
Fig.5B- 2-AG in midbrain (sal vs coc)		3									text:257, 350
Fig.5B-Cocaine	2	3	Unpaired t-test		0.0419			338.6 ± 33.55			text:257, 350
Fig.5B-Saline	2	3	Unpaired t-test					552.1 ± 64.08		12.69 to 414.3	text:257, 350
Fig.5C-Saline	15	5	Unpaired t-test		0.147			13.63 ± 5.474
Fig.5C-Cocaine	15	5	Unpaired t-test					39.10 ± 14.88		-11.08 to 62.03	test:353, Fig. 5C
Fig.5D- no statistics											text: 263,370,395-396
Fig.5E-F: Wildtype (WT) mice-cocaine incubation	7	12	Unpaired t-test			N/A	control	71.55	62.15	80.94	Text:282, 353,370 Fig. 5D+E
Fig.5E-F: CB1R KO mice-cocaine incubation	4	12	Unpaired t-test			N/A	0.0004	98.71	87.97	109.4	Text:284, 353,370 Fig. 5D+E
Fig.5G-H: WT mice-cocaine incubation	5	10	1-way ANOVA	F(3,40)=8.299	0.0002	Tukey's multiple comparison	control	75.94	68.86	83.02	Text: 283, Fig.5D+E
Fig.5G-H: WT mice-AM251 pre-incubation+ cocaine	6	10	1-way ANOVA			Tukey's multiple comparison	0.0001	107.1	104.8	109.3	Text:283, Fig.5D+E
Fig.5G-H: DGLα KO mice-cocaine incubation	10	14	1-way ANOVA			Tukey's multiple comparison	0.0085	96.18	84.59	107.8	Text: 287,353,370 Fig.5F+G
Fig.5G-H: DGLα KO mice-AM251 incubation	11	13	1-way ANOVA			Tukey's multiple comparison	0.0124	94.98	85.11	104.8	Text: 287,353,370 Fig.5F+G
Fig. 6B, 6E: WT mice-cocaine incubation	6	13	1-way ANOVA	F(4,62)=8.532	<0.0001	Bonferroni's multiple comparison	control	70.01	61.04	78.98	Text: 292 Fig.6B+E
Fig. 6B, 6E: WT mice-NE100 pre-incubation + cocaine	8	15	1-way ANOVA			Bonferroni's multiple comparison	<0.0001	94.95	88.97	100.9	Text: 292 Fig.6B+E
Fig. 6C, 6E: WT mice-BD1063 pre-incubation +cocaine	6	13	1-way ANOVA			Bonferroni's multiple comparison	0.0058	86.11	79.74	92.49	Text: 292 Fig.6C+E
Fig. 6D, 6E: Sigma-1R WT-cocaine incubation	10	12	1-way ANOVA			Bonferroni's multiple comparison	control	70.01	61.04	78.98	Text: 294 Fig.6D+E
Fig. 6D, 6E: Sigma-1R KO mice-cocaine incubation	8	12	1-way ANOVA			Bonferroni's multiple comparison	0.0002	91.1	83.49	98.7	Text: 294 Fig.6D+E
Fig. 7B: WT mice-DHPG+PE	5	10	1-way RM ANOVA	F(1.5,110) = 133	<0.0001	Tukey's multiple comparison	control	84.15	82.01	86.03	Text: 317, 320, 321 Fig.7B
Fig. 7B: Sig-1R KO mice-DHPG+PE	6	13	1-way RM ANOVA			Tukey's multiple comparison	<0.0001	94.07	92.97	95.16	Text: 317, 320, 321 Fig.7B
Fig. 7B: WT mice-AM251	7	14	1-way RM ANOVA			Tukey's multiple comparison	<0.0001	100.5	94.9	101.5	Text: 317, 320, 321 Fig.7B
Fig. 7C: WT mice-DHPG+PE	5	10	1-sample t-test			N/A	0.0014	78.4	67.63	89.17	Text: 317, 321 Fig.7C
Fig. 7C: Sig-1R KO mice-DHPG+PE	6	13	1-way ANOVA	F(2,34) = 11.0	0.0002	Dunnett's multiple comparison	0.0013	93.18	85.3	101.1	Text: 317, 321 Fig.7C
Fig. 7C: WT mice-AM251	7	14	1-way ANOVA			Dunnett's multiple comparison	< 0.0001	102.1	97.05	107.1	Text: 317, 321 Fig.7C
Fig. 7E: WT mice-AM251	8	15	unpaired t-test			N/A	control	151	133	169	Fig.7E caption
Fig. 7E: Sig-1R KO mice+AM251	6	11	unpaired t-test			N/A	0.7632	147	123	170	Fig.7E caption
Fig. 7E: WT mice-AM251	8	15	1-sample t-test			N/A	<0.0001	150.7	132.7	168.7	Fig.7E caption
Fig. 7E: Sig-1R KO mice+AM251	6	11	1-sample t-test			N/A	0.0013	146.7	123.1	170.2	Fig.7E caption
Fig.8A, 8E: WT mice-cocaine incubation	5	11	1-way ANOVA	F(3,39)=8.701	0.0002	Tukey's multiple comparison	control	70.19	60.57	81.34	Text: 304, 307 Fig.7A+E
Fig.8A, 8E: WT mice-SH3 pre-incubation+cocaine	8	12	1-way ANOVA			Tukey's multiple comparison	0.0006	91.65	82.97	100.3	Text: 304, 307 Fig.7A+E
Fig.8B, 8E: WT mice-NAV2729 pre-incubation+cocaine	6	12	1-way ANOVA			Tukey's multiple comparison	0.001	93.14	91.37	94.9	Text: 304,307 Fig.7B+E
Fig.8C, 8E: WT mice-ML7 pre-incubation+cocaine	5	13	1-way ANOVA			Tukey's multiple comparison	0.0018	89.9	84.83	94.97	Text: 309 Fig.7C+E
Fig.S1- no statistics											text: 167, 175, 522
Fig.S2A- siRNA x-fold change expression	2	6	1-sample t-test		<0.0001	N/A	N/A	1	0.49	0.26 to 00.69	Fig.S2 caption
Fig.S2A- siSig1R	4	12	1-way ANOVA	F(3,8)=40.19	<0.0001
Fig.S2A- siCont-Veh vs. siCont-Coc	4	12	1-way ANOVA			Tukey's multiple comparisons test	0.0101	100	168.2	-118.1 to -18.29	text: 126-127
Fig.S2A- siCont-Veh vs. siSig1R-Veh	4	12	1-way ANOVA			Tukey's multiple comparisons test	0.0001	100	231.3	-181.2 to -81.36	text: 126-127
Fig.S2A- siCont-Veh vs. siSig1R-Coc	4	12	1-way ANOVA			Tukey's multiple comparisons test	<0.0001	100	256.1	-206 to -106.2	text: 126-127
Fig.S2A- siCont-Coc vs. siSig1R-Veh	4	12	1-way ANOVA			Tukey's multiple comparisons test	0.0156	168.2	231.3	-113 to -13.16	text: 126-127
Fig.S2A-siCont-Coc vs. siSig1R-Coc	4	12	1-way ANOVA			Tukey's multiple comparisons test	0.0022	168.2	256.1	-137.8 to -37.99	text: 126-127
Fig.S2A-siSig1R-Veh vs. siSig1R-Coc	4	12	1-way ANOVA			Tukey's multiple comparisons test	0.4331 ns	231.3	256.1	-74.74 to 25.08	text: 126-127
Fig.S2B- Integrin B1 (EYFP)		3									text: 128
Fig.S2B- Data Set-A	2	3				Unpaired t-test	0.0008	ColA: 100 ± 0		31.95 to 59.91	text: 128
Fig.S2B- Data Set-B	2	3				Unpaired t-test		ColB: 54.07 ± 5.035			text: 128
Fig.S2C- no statistics											text: 148,154, 157, 333-334
Fig.S3- no statistics											text: 627
Fig.S4: WT mice-cocaine incubation	6	12	2-way RM ANOVA	F(144, 2232) = 2.70	< 0.0001	Dunnett's multiple comparison	control	76.83	74	79.65	Text: 369 Fig.4S
Fig.S4B: WT mice- THL preincubation+cocaine	7	11	2-way RM ANOVA			Dunnett's multiple comparison	< 0.0001	97.58	95.94	99.21	Text: 369 Fig.4S
Fig.S4B: WT mice-AM251 pre-incubation+ cocaine	6	10	2-way RM ANOVA			Dunnett's multiple comparison	< 0.0001	98.45	97.03	99.87	Text: 369 Fig.4S
Fig.S4A4: WT mice-CGP55845 incubation	4	9	N/A			N/A	N/A	N/A	N/A	N/A	Text: 369 Fig.4S
Fig.S5A, S5F: WT mice-WIN55,212-2 control	6	12	1-way ANOVA	F(2,31)=3.838	0.0324	Dunnett's multiple comparison	control	75.85	70.22	81.47	Text: 296, 380 Fig.S5A+F
Fig.S5A, S5F: WT mice-NE100 pre-incubation + WIN55,212-2	5	11	1-way ANOVA			Dunnett's multiple comparison	0.5936	65.79	57.56	74.02	Text: 296, 380 Fig.S5A+F
Fig.S5A, S5F: Sigma-1R KO mice-WIN55,212-2	7	11	1-way ANOVA			Dunnett's multiple comparison	0.5293	65.61	59.37	71.86	Text: 296, 380 Fig.S5D+F
											text: 385
